# Supplementary material for: Tuning the optical absorption performance of MoS2 monolayers with compressive strain
Source: Royal Society of Chemistry journal article supplement (doi:10.1039/d2nr04362a), 2022-01-01
Supplement: d2nr04362a1.pdf [file d2nr04362a1.pdf]

## *Supporting Information*

for

### **Tuning the optical absorption performance of MoS<sub>2</sub> monolayers by compressive strain**

Yibin Zhao,<sup>a</sup> Zhengwei Du,<sup>a</sup> Licheng Wang,<sup>b</sup> Mingyan Liu,<sup>a</sup> Xudong Hu,<sup>c</sup> Bing Yao,<sup>d</sup>  
Xiaoming Li,<sup>c</sup> Libo Gao,<sup>d</sup> Cong Liu,<sup>\*b</sup> Yi Wan,<sup>\*a</sup> and Erjun Kan<sup>\*a</sup>

<sup>a</sup> *MIIT Key Laboratory of Semiconductor Microstructure and Quantum Sensing, Department of Applied Physics, Nanjing University of Science and Technology, 210094 Nanjing, China*

<sup>b</sup> *Civil Engineering & Applied Mechanics Lab, School of Science, Nanjing University of Science and Technology, 210094 Nanjing, China*

<sup>c</sup> *MIIT Key Laboratory of Advanced Display Materials and Devices, Institute of Optoelectronics & Nanomaterials, School of Material Science and Engineering, Nanjing University of Science and Technology, Nanjing 210094, China*

<sup>d</sup> *National Laboratory of Solid State Microstructures and Department of Physics, Nanjing University, Nanjing 210093, China*

\*Correspondence and requests for materials should be addressed to:

Erjun Kan (email: ekan@njust.edu.cn)

Yi Wan (email: wany@njust.edu.cn)

Cong Liu (email: LiuC@njust.edu.cn)

## This file includes:

- S1 Topography characterizations of monolayer MoS<sub>2</sub>
- S2 Schematic diagram of sample transfer process
- S3 Photograph of the home-made strain loading equipment
- S4 Monolayer MoS<sub>2</sub> in a bent state
- S5 Schematic diagram of optical absorption measurement equipment
- S6 Optical absorption spectra obtained from different samples

### S1 Topography characterizations of monolayer MoS<sub>2</sub>

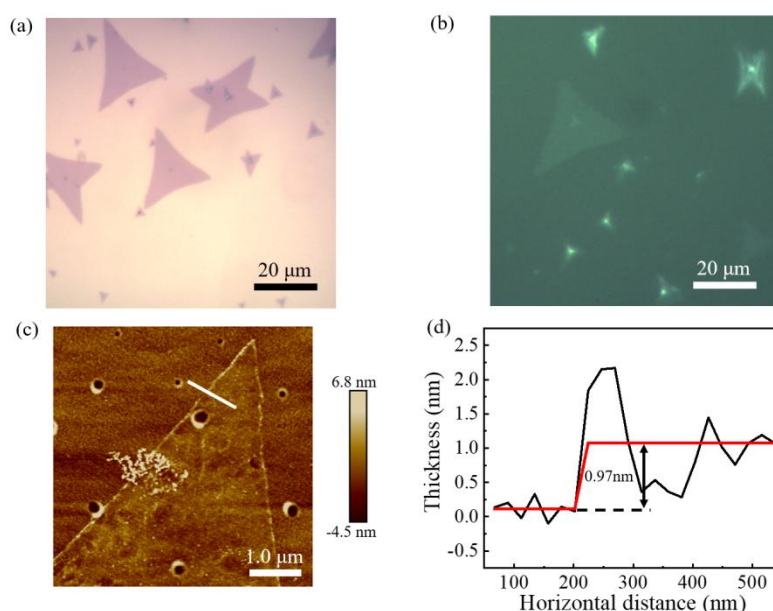

**Figure S1. Characterization of monolayer MoS<sub>2</sub>.** (a) Optical microscopy image of monolayer MoS<sub>2</sub> grown on SiO<sub>2</sub>/Si substrate by CVD method. (b) Optical microscopy image of monolayer MoS<sub>2</sub> transferred onto PET substrate. (c) AFM image of monolayer MoS<sub>2</sub>. (d) Height profile along the white line as shown in (c). The thickness of the sample terrace is measured to be around 0.97 nm, indicating its monolayer nature.

Monolayer MoS<sub>2</sub> samples were synthesized by a chemical vapor deposition (CVD) method. Optical microscopy images of the monolayer MoS<sub>2</sub> samples directly deposited on SiO<sub>2</sub>/Si substrate and transferred onto flexible polyethylene terephthalate (PET) substrate, are displayed in **Figure S1a** and **S1b**, respectively. Morphology characterization of monolayer MoS<sub>2</sub> was performed by atomic force microscope

(AFM) technique (Figure S1c). Figure S1d presents the measured height profile of the MoS<sub>2</sub> sample along the white line as shown in Figure S1c. The sample thickness is measured to be about 0.97 nm, as an indication of the monolayer nature.

## S2 Schematic diagram of sample transfer process

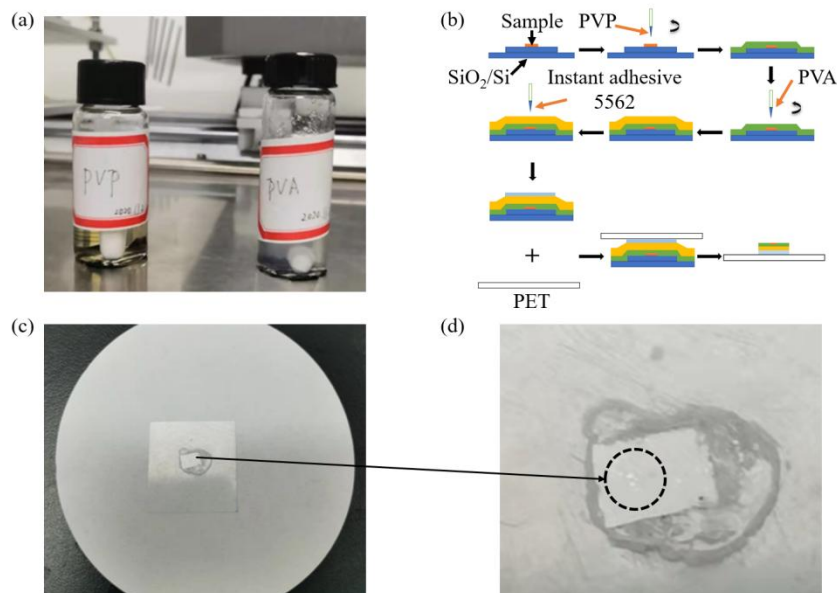

**Figure S2. Schematic diagram of transfer process for 2D materials.** (a) PVP and PVA aqueous solutions. (b) Schematic diagram of sample transfer process. (c, d) Photographs of a sample transferred onto PET.

**Figure S2a** presents the fully dissolved polyvinyl pyrrolidone (PVP) and polyvinyl alcohol (PVA) organic solvent aqueous solutions, which are used to transfer the large-area MoS<sub>2</sub> monolayers. The transfer experimental procedure is schematically presented in Figure S2b. SiO<sub>2</sub>/Si wafer is cut into a step-like shape for convenient transfer. And then, 9 wt% PVP ([C<sub>6</sub>H<sub>9</sub>NO]<sub>n</sub>) and 10 wt% PVA ([C<sub>2</sub>H<sub>4</sub>O]<sub>n</sub>) aqueous solutions are spin-coated in sequence onto the entire SiO<sub>2</sub>/Si wafer. Afterwards, a 0.5 mm PET flexible film is glued atop the PVA/PVP composite membrane, with the assistance of an instant adhesive 5562. After left for 24 h, the composite membrane with 2D samples can be easily peeled from SiO<sub>2</sub>/Si wafer. Figure S2c and S2d display the photographs of the membrane transferred onto PET flexible substrate, denoted by the dashed circle.

### S3 Photograph of the home-made strain loading equipment

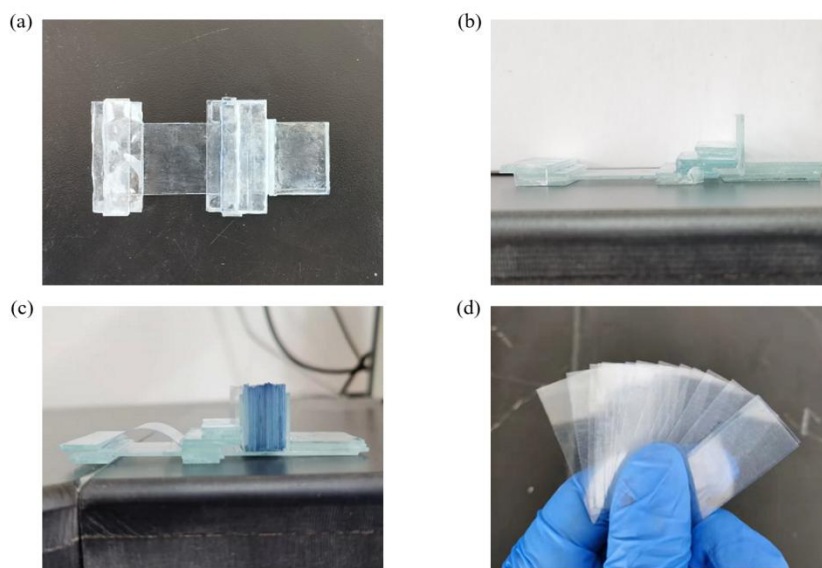

**Figure S3. The home-made strain loading equipment.** (a-c) Photographs of the strain loading equipment from different views. (d) Photograph of calibration cards, used for strain loading.

**Figure S3a-c** display the structure of the strain loading equipment from different views, which is made of glass slides and flexible PET. **Figure S3d** shows the calibration cards used for strain loading. The calibration card is made of PET and the thickness of each calibration card is 0.18 mm.

#### S4 Monolayer MoS<sub>2</sub> in a bent state

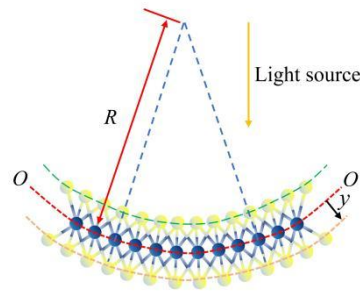

**Figure S4. Schematic diagram of monolayer MoS<sub>2</sub> in a bent state.**

As shown in **Figure S4**, in the curved substrates with developable surfaces, 2D semiconductors bear uniaxial strain with tension and compression simultaneously when bending the substrate<sup>[S1]</sup>. The strain applied to monolayer MoS<sub>2</sub> is determined by the bending stress formula:  $\varepsilon=y/R$ , where  $\varepsilon$  is the strain value,  $y$  is the distance away from the neutral layer  $OO'$ , and  $R$  is the radius of curvature of the neutral layer  $OO'$ . Since the  $y$  value along the concave side of MoS<sub>2</sub> (green dashed curve shown in Figure S4) is negative, the corresponding  $\varepsilon$  value is negative, as an indication of applying compressive strain.

## S5 Schematic diagram of optical absorption measurement equipment

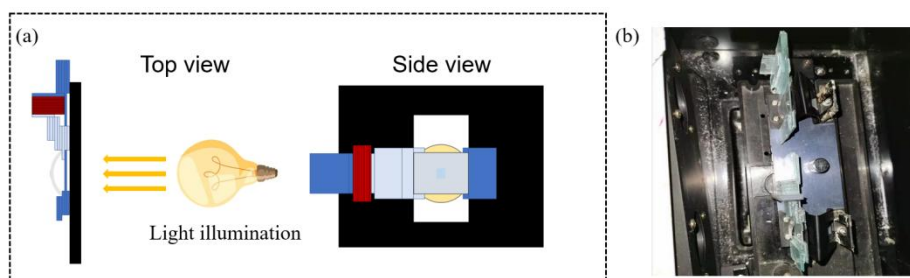

**Figure S5. Schematic diagram and photograph of optical absorption measurement equipment.** (a) Schematic diagrams of optical absorption measurement equipment for 2D materials under compression. (b) Photograph of optical absorption measurement equipment for 2D materials under compression.

**Figure S5a** schematically display the experimental setup for optical absorption spectrum measurement, which is used for collecting optical signals from 2D materials under compression. **Figure S5b** present the photograph of the absorption measurement system for 2D materials under compression.

## S6 Optical absorption spectra obtained from different samples

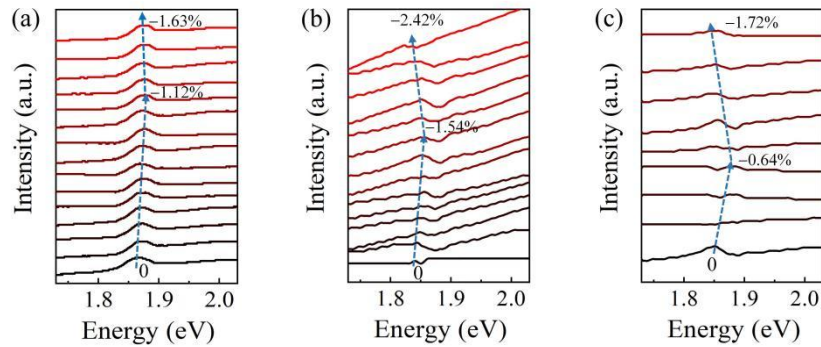

**Figure S6. Optical absorption spectra obtained from different MoS<sub>2</sub> samples under compression.**

The optical absorption spectra measurements were performed on three different samples, as presented in **Figure S6**. The highest value of the compressive strain loaded in this work was  $-2.42\%$ . The trend of first blueshift and then redshift under the increasing compression has been observed for all measured MoS<sub>2</sub> samples, proving the good repeatability of our experiment. Due to the sample variation, the critical values of the applied compressive strain are different, with  $-1.12\%$  for sample (a),  $-1.54\%$  for sample (b), and  $-0.64\%$  for sample (c).

Reference:

[S1] J. Du, H. Yu, B. Liu, M. Hong, Q. Liao, Z. Zhang and Y. Zhang, *Small Methods*, 2021, **5**, 2000919.
